# Supplementary material for: Does women’s caste make a significant contribution to adolescent pregnancy in Nepal? A study of Dalit and non-Dalit adolescents and young adults in Rupandehi district
Source: PubMed Central journal article supplement (PMC5778648; doi:10.1186/s12905-018-0513-4), 2018-01-22
Supplement: 12905_2018_513_MOESM2_ESM.pdf [file 12905_2018_513_MOESM2_ESM.pdf]

२४ बर्ष भन्दा मुनिका गर्भवति वा बच्चा भएका महिलाहरूलाई सोधिने प्रश्नावलि

| प्र.नं                                                            | प्रश्न                                 | कोड                                                                                                                                                                                     | स्कीप                |
|-------------------------------------------------------------------|----------------------------------------|-----------------------------------------------------------------------------------------------------------------------------------------------------------------------------------------|----------------------|
| <b>क.सामाजिक, आर्थिक तथा जनसांख्यिक विवरण सम्बन्धि प्रश्नहरु:</b> |                                        |                                                                                                                                                                                         |                      |
| १                                                                 | उत्तरदाताको नाम                        | ..... <input type="text"/> <input type="text"/> <input type="text"/>                                                                                                                    |                      |
| २                                                                 | नगरपालिका/गा.वि.स नाम                  | ..... <input type="text"/> <input type="text"/>                                                                                                                                         |                      |
| ३                                                                 | तपाईंको घर कति नं वडामा पर्छ ?         | वडा नं. .... <input type="text"/> <input type="text"/>                                                                                                                                  |                      |
| ४                                                                 | गाउँ/टोल                               | .....                                                                                                                                                                                   |                      |
| ५                                                                 | तपाईं कति वर्ष पुरा हुनु भयो ?         | उमेर वर्षमा लेख्नुहोस् <input type="text"/> <input type="text"/>                                                                                                                        |                      |
| ६                                                                 | उत्तरदाताको जात थर ?                   | दलित (तराई).....१<br>दलित (पहाड).....२<br>ब्राम्हण/क्षेत्री (तराई).....३<br>ब्राम्हण/क्षेत्री (पहाड).....४<br>जनजाती (तराई).....५<br>जनजाती (पहाड).....६<br>अन्य (खुलाउनुहोस्) _____ ९६ |                      |
| ७                                                                 | तपाईं कुन धर्म मान्नु हुन्छ ?          | हिन्दू .....१<br>बौद्ध.....२<br>ईस्लाम (मुस्लिम).....३<br>ईसाइ (क्रिस्चियन).....४<br>अन्य (खुलाउनुहोस्)..... ९६                                                                         |                      |
| ८                                                                 | तपाईं लेख पढ गर्न सक्नु हुन्छ ?        | सक्छु.....१<br>सकिदैन.....२                                                                                                                                                             |                      |
| ९                                                                 | तपाईंको पढाइको स्तर कति सम्म रहेको छ ? | अनौपचारिक शिक्षा.....१<br>प्राथमिक (१ देखि ५).....२<br>माध्यमिक (६ देखि १०/SLC).....३<br>उच्च माध्यमिक (+२).....४<br>उच्च शिक्षा/विश्व विद्यालय.....५                                   | प्रश्न १२<br>मा जाने |

|                                     |                                                                                                                           |                                                                                                                                                                                                                                                        |  |
|-------------------------------------|---------------------------------------------------------------------------------------------------------------------------|--------------------------------------------------------------------------------------------------------------------------------------------------------------------------------------------------------------------------------------------------------|--|
| १०                                  | के कारण ले पढाइ छोड्नु भयो ?<br><br>(SLC भन्दा अगाडि विद्यालय छोडने लाई सोध्ने)                                           | घरको आर्थिक अवस्था कमजोर भएर.....१<br>भाईबहिनीको स्याहार सुसार गर्नु परेकोले.....२<br>परिक्षामा फेल भएकोले.....३<br>अरु विद्यार्थीहरु भन्दा मध्यम भएकोले.....४<br>बिवाहको कारणले .....५<br>यौन दुरव्यवहारको कारणले .....६<br>अन्य (खुलाउनुहोस) .....९६ |  |
| ११                                  | पढाइ छोड्दा तपाईको उमेर कति थियो ?                                                                                        | पुरा वर्षमा <input type="text"/> <input type="text"/>                                                                                                                                                                                                  |  |
| १२                                  | तपाईको व्यवसाय के हो ?                                                                                                    | विद्यार्थी.....१<br>गृहिणी.....२<br>किसान.....३<br>नियमित ज्याला मजदुरी.....४<br>कहिले काँही ज्याला मजदुरी.....५<br>साना व्यापार व्यवसाय.....६<br>जागिर.....७<br>अन्य (खुलाउने).....९६                                                                 |  |
| १३                                  | हाल तपाईको श्रीमान कहाँ हुनुहुन्छ ?                                                                                       | अविवाहित.....१<br>बिवाहित.....२<br>बिदुवा.....३<br>पारपाचुके/छोडपत्र.....४                                                                                                                                                                             |  |
| <b>ख. पारिवारीक बिबरण प्रश्नहरु</b> |                                                                                                                           |                                                                                                                                                                                                                                                        |  |
| १४                                  | तपाईको परिवारको प्रकार<br>(संयुक्त- सासु/ससूरा सहित एउटै घरमा बसेको)<br>(बृहत-सासु/ससूरा, काका/काकी सहित एउटै घरमा बसेको) | एकल.....१<br>संयुक्त .....२<br>बृहत.....३                                                                                                                                                                                                              |  |
| १५                                  | तपाईको परिवारको घरमुली को हो ?                                                                                            | उत्तरदाता आफै .....१<br>श्रीमान.....२<br>ससूरा.....३<br>सासु.....४<br>अन्य खुलाउनुहोस .....९६                                                                                                                                                          |  |

|    |                                                |                                                                                                                                                            |                      |
|----|------------------------------------------------|------------------------------------------------------------------------------------------------------------------------------------------------------------|----------------------|
| १६ | तपाईंको श्रीमानले कति पढ्नु भएको छ ?           | अनौपचारिक शिक्षा..... १<br>प्राथमिक (१ देखि ५)..... २<br>माध्यमिक (६ देखि १०/SLC)..... ३<br>उच्च माध्यमिक (+२)..... ४<br>उच्च शिक्षा/विश्व विद्यालय..... ५ |                      |
| १७ | तपाईंको श्रीमानको मुख्य पेशा के हो ?           | वेरोजगार..... १<br>कृषि ..... २<br>ज्यालामजदुरी..... ३<br>सानो व्यापार..... ४<br>जागिर..... ५<br>स्वरोजगार..... ६<br>अन्य (खुलाउनुहोस) ..... ९६            |                      |
| १८ | तपाईंको परिवारको मुख्य आम्दानीको श्रोत के हो ? | कृषि.... १<br>ज्यालामजदुरी..... २<br>सानो व्यापार/व्यवसाय..... ३<br>जागिर..... ४<br>घरभाडा..... ५<br>अन्य (खुलाउनुहोस) ..... ९६                            |                      |
| १९ | तपाईंको परिवारको आफ्नो घर छ ?                  | छ..... १<br>छैन..... २ →                                                                                                                                   | प्रश्न २१<br>मा जाने |
| २० | तपाईंको घरको छाना के को छ ?                    | खर/छवाली..... १<br>टिन/जस्ता..... २<br>टाईल/खपटा..... ३<br>सिमेन्ट..... ४<br>प्लास्टिक/टेन्ट..... ५<br>अन्य (खुलाउनुहोस) ..... ९६                          |                      |
| २१ | तपाईंको घरमा चर्पी छ ?                         | छ..... १<br>छैन..... २ →                                                                                                                                   | प्रश्न २३<br>मा जाने |

|    |                                                                              |                                                                                                                                                                                                                                                                                                                              |  |
|----|------------------------------------------------------------------------------|------------------------------------------------------------------------------------------------------------------------------------------------------------------------------------------------------------------------------------------------------------------------------------------------------------------------------|--|
| २२ | यदि छ भने कुन प्रकारको छ ?                                                   | अस्थाई.....१<br>स्थाई.....२<br>अन्य (खुलाउनुहोस) .....९६                                                                                                                                                                                                                                                                     |  |
| २३ | तपाईले कहाँको पानी प्रयोग गर्नुहुन्छ ?                                       | पाइपको पानी (सार्वजनिक).....१<br>पाइपको पानी (निजी).....२<br>ट्यूब वेल (सार्वजनिक).....३<br>ट्यूब वेल (निजी).....४<br>ईनार/कुवा (सार्वजनिक).....५<br>ईनार/कुवा (निजी).....६<br>अन्य (खुलाउनुहोस) .....९६                                                                                                                     |  |
| २४ | के तपाईको परिवारले गाईवस्तु पाल्नु भएको छ ?                                  | छ.....१<br>छैन.....२                                                                                                                                                                                                                                                                                                         |  |
| २५ | के तपाईको परिवारले निम्न उल्लेखित जनावरहरू पाल्नु भएको छ ?<br><br>(बहुउत्तर) | भैसी..... <input type="checkbox"/><br>गाई/गोरु..... <input type="checkbox"/><br>घोडा/गधा..... <input type="checkbox"/><br>भेंडा/बाखा..... <input type="checkbox"/><br>कुखुरा/हाँस..... <input type="checkbox"/><br>परेवा..... <input type="checkbox"/><br>सूंगूर ..... <input type="checkbox"/><br>अन्य (खुलाउनुहोस) .....९६ |  |
| २६ | तपाईको घरमा तलका सामानहरू छन् ?<br><br>(बहुउत्तर)                            | विजुली.....१<br>मोटरबाईक.....२<br>रिक्सा.....३<br>राँगागाडा वा वयलगाडा.....४<br>साईकल.....५<br>मोबाइल फोन.....६<br>टि.भी.....७<br>रेडियो.....८<br>पङ्खा.....९<br>कम्प्यूटर.....१०<br>फ्रिज.....११                                                                                                                            |  |

ग. माइती (अमावावुको) विवरण सम्बन्धि प्रश्नहरु

|    |                                                  |                                                                                                                                                                                        |           |
|----|--------------------------------------------------|----------------------------------------------------------------------------------------------------------------------------------------------------------------------------------------|-----------|
| २७ | उत्तरदाताको माईत को जात/थर के हो ?               | दलित (तराई).....१<br>दलित (पहाड).....२<br>ब्राम्हण/क्षेत्री (तराई).....३<br>ब्राम्हण/क्षेत्री (पहाड).....४<br>जनजाती (तराई).....५<br>जनजाती (पहाड).....६<br>अन्य (खुलाउनुहोस) ..... ९६ |           |
| २८ | तपाईंको बुवाले कति पढ्नु भएको छ ?                | पढ्नु भएको छैन.....१<br>अनौपचारिक शिक्षा.....२<br>प्राथमिक (१ देखि ५).....३<br>माध्यमिक (६ देखि १०/SLC).....४<br>उच्च माध्यमिक (+२).....५<br>उच्च शिक्षा/विश्व विद्यालय.....६          |           |
| २९ | तपाईंको आमाको कति पढ्नु भएको छ ?                 | पढ्नु भएको छैन.....१<br>अनौपचारिक शिक्षा.....२<br>प्राथमिक (१ देखि ५).....३<br>माध्यमिक (६ देखि १०/SLC).....४<br>उच्च माध्यमिक (+२).....५<br>उच्च शिक्षा/विश्व विद्यालय.....६          |           |
| ३० | तपाईंको आमा बुवा को मुख्य आम्दानीको स्रोत के हो? | कृषि.....१<br>ज्यालामजदुरी.....२<br>सानो व्यापार/व्यवसाय.....३<br>जागिर.....४<br>घरभाँडा.....५<br>अन्य (खुलाउनुहोस) ..... ९६                                                           |           |
| ३१ | तपाईंको आमा बुवा को आफ्नो घर छ ?                 | छ.....१<br>छैन.....२                                                                                                                                                                   | प्रश्न ३३ |

|    |                                                                                           |                                                                                                                                                                                                                                                                                                                                |                      |
|----|-------------------------------------------------------------------------------------------|--------------------------------------------------------------------------------------------------------------------------------------------------------------------------------------------------------------------------------------------------------------------------------------------------------------------------------|----------------------|
| ३२ | तपाईंको आमा बुवा को घरको छाना के को छ ?                                                   | खर/छवाली.....१<br>टिन/जस्ता.....२<br>टाईल/खपटा.....३<br>सिमेन्ट.....४<br>पलास्टीक/टेन्ट.....५<br>अन्य (खुलाउनुहोस) ..... ९६                                                                                                                                                                                                    |                      |
| ३३ | तपाईंको आमा बुवाको घरमा चर्पी छ ?                                                         | छ.....१<br>छैन.....२ →                                                                                                                                                                                                                                                                                                         | प्रश्न ३५            |
| ३४ | यदि छ भने कुन प्रकारको छ ?                                                                | अस्थायी.....१<br>स्थायी.....२<br>अन्य (खुलाउनुहोस) ..... ९६                                                                                                                                                                                                                                                                    |                      |
| ३५ | तपाईंको आमा बुवाले कहाँको पानी प्रयोग गर्नुहुन्छ ?                                        | पाइपको पानी (सार्वजनिक).....१<br>पाइपको पानी (निजी).....२<br>टयूव वेल (सार्वजनिक).....३<br>टयूव वेल (निजी).....४<br>ईनार/कुवा (सार्वजनिक).....५<br>ईनार/कुवा (निजी).....६<br>अन्य (खुलाउनुहोस) ..... ९६                                                                                                                        |                      |
| ३६ | के तपाईंको माइतमा (आमा /बुवाले) गाईवस्तु पाल्नु भएको छ ?                                  | छ.....१<br>छैन.....२ →                                                                                                                                                                                                                                                                                                         | प्रश्न ३८<br>मा जाने |
| ३७ | के तपाईंको माइतमा (आमा /बुवाले) निम्न उल्लेखित जनावरहरु पाल्नु भएको छ ?<br><br>(बहुउत्तर) | भैसी..... <input type="checkbox"/><br>गाई/गोरु..... <input type="checkbox"/><br>घोंडा/गधा..... <input type="checkbox"/><br>भेंडा/बाखा..... <input type="checkbox"/><br>परेवा..... <input type="checkbox"/><br>कुखुरा/हाँस..... <input type="checkbox"/><br>सूंगूर ..... <input type="checkbox"/><br>अन्य (खुलाउनुहोस) ..... ९६ |                      |

|    |                                                                   |                                                                                                                                                                                                              |  |
|----|-------------------------------------------------------------------|--------------------------------------------------------------------------------------------------------------------------------------------------------------------------------------------------------------|--|
| ३८ | के तपाईंको आमा बुवा को घरमा तलका सामानहरु छन् ?<br><br>(बहुउत्तर) | विजुली..... १<br>मोटरबाईक..... २<br>रिक्सा..... ३<br>रांगागाडा वा वयलगाडा..... ४<br>साईकल..... ५<br>मोबाइल फोन..... ६<br>टि.भी..... ७<br>रेडियो..... ८<br>पड्खा..... ९<br>कम्प्यूटर..... १०<br>फ्रिज..... ११ |  |
|----|-------------------------------------------------------------------|--------------------------------------------------------------------------------------------------------------------------------------------------------------------------------------------------------------|--|

**घ. ब्यक्तिगत आनिबानी सम्बन्धि प्रश्नहरु**

|    |                                                                                                      |                                                                                            |                     |
|----|------------------------------------------------------------------------------------------------------|--------------------------------------------------------------------------------------------|---------------------|
| ३९ | तपाईं कुनै क्लब, स्थानिय हाट बजार मेला, भोजभतेर, नाचगान कार्यक्रमहरुमा रमाईलोको लागि जानु हुन्थ्यो ? | थियो..... १<br>थिएन..... २                                                                 | → प्रश्न ४१ मा जाने |
| ४० | यदि जानु भएको भए प्राय कति पटक जानु हुन्थ्यो ?                                                       | नियमित..... १<br>बहिलेकाहि..... २<br>मैका मिलेमा ..... ३<br>एकपटक मात्र..... ४             | → प्रश्न ४३ मा जाने |
| ४१ | तपाईं कहिल्यै सिनेमा हेर्न जाने गर्नु भएको छ ?                                                       | छ..... १<br>छैन..... २                                                                     |                     |
| ४२ | यदि जानु भएको भए प्राय कति पटक जानुभयो ?                                                             | नियमित..... १<br>बहिलेकाहि..... २<br>मैका मिलेमा ..... ३<br>एकपटक मात्र..... ४             |                     |
| ४३ | तपाईं कहिले काहीं मादक पदार्थ सेवन गर्नुहुन्छ ?                                                      | गर्दिन..... १<br>एक पटक..... २<br>मैका मिलेमा ..... ३<br>कहिलेकाहि..... ४<br>नियमित..... ५ |                     |

|                                             |                                                                     |                                                                                                                                                             |                      |
|---------------------------------------------|---------------------------------------------------------------------|-------------------------------------------------------------------------------------------------------------------------------------------------------------|----------------------|
| ४४                                          | तपाईं चुरोट सेवन गर्नु हुन्छ ?                                      | गर्दिन .....१<br>एक पटक.....२<br>मैका मिलेमा .....३<br>कहिलेकाहि.....४<br>नियमित.....५                                                                      |                      |
| <b>ड. विवाह तथा गर्भ सम्बन्धि प्रश्नहरू</b> |                                                                     |                                                                                                                                                             |                      |
| ४५                                          | तपाईंको विवाहको प्रकार कस्तो थियो ?                                 | प्रेम विवाह/आफै.....१<br>ववु आमाले दिएको.....२ →                                                                                                            | प्रश्न ४८<br>मा जाने |
| ४६                                          | यदि प्रेम विवाह भएको भए, तपाईंले आफ्नो जीवन साथी कसरी भेटाउनु भयो ? | विद्यालयको साथी.....१<br>फेसबुक/सामाजिक संजालमा भेटेको .....२<br>साथीको माध्यमबाट भेटेको .....३<br>स्थानीय क्लबमा भेटेको .....४<br>.अन्य खुलाउनुहोस).....९६ |                      |
| ४७                                          | यदि प्रेम विवाह भएको भए, तपाईं कसरी प्रभावित हुनु भयो ?             | कसैबाट पनि होइन/आफै.....१<br>टेलिभिजन/फिल्मबाट.....२<br>साथीअरुको दवाफबाट.....३<br>दुबैको सहमतिद्वारा.....४<br>अन्य (खुलाउनुहोस).....९६                     |                      |
| ४८                                          | तपाईंको विवाहको निर्णय कस्ले ग-यो ?                                 | आफै.....१ →<br>आमा/वुवाले.....२<br>परिवारका अन्य सदस्यहरूले.....३<br>अन्य (खुलाउनुहोस) .....९६                                                              | प्रश्न ५०<br>मा जाने |
| ४९                                          | तपाईंको विवाहको बारेमा तपाईंलाई सोधिएको थियो ?                      | थियो.....१<br>थिएन.....२                                                                                                                                    |                      |
| ५०                                          | तपाईंको विवाह गर्दाको उमेर कति थियो ?                               | (पुरा उमेर वर्षमा) <input type="text"/> <input type="text"/>                                                                                                |                      |



|    |                                                                           |                                                                                                                                                                                                                |           |
|----|---------------------------------------------------------------------------|----------------------------------------------------------------------------------------------------------------------------------------------------------------------------------------------------------------|-----------|
| ५१ | नेपालको कानून अनुसार महिलाको लागि विवाह गर्ने वैधानिक उमेर कति हो ?       | थाहा छैन..... १<br>१५ वर्ष..... २<br>१६ वर्ष..... ३<br>१७ वर्ष..... ४<br>१८ वर्ष..... ५<br>१९ वर्ष..... ६<br>२० वर्ष..... ७                                                                                    |           |
| ५२ | तपाईंको विवाह गर्नुको कारण के थियो ?<br><br>(बहुउत्तर)                    | आर्थिक अवस्था कमजोर..... १<br>ठिलो विवाह गर्दा खर्चिलो हुने..... २<br>संस्कृति तथा रीतिरिवाज..... ३<br>अवैधानिक सम्बन्ध/बलत्कार/दुरव्यवहार..... ४<br>विध्यालय छाडेको/फेल भएकोले..... ५<br>अन्य (खुलाउनुहोस) ९६ |           |
| ५३ | उमेर नपुगि विवाह गर्दा महिलामा हुनसक्ने असरहरुको बारेमा तपाईंलाई थाहा छ ? | छ..... १<br>छैन..... २                                                                                                                                                                                         | → पश्न ५५ |
| ५४ | यदि थाहा छ भने ती असरहरु के के हुन् त ?<br><br>(बहुउत्तर)                 | पढाई छोड्नु पर्ने हुन्छ..... १<br>छिटै बच्चा जन्मिनु..... २<br>शारीरिक असर..... ३<br>मानसिक असर..... ४<br>आत्मानिरभरतामा कमी..... ५<br>अन्य (खुलाउनुहोस) ..... ९६                                              |           |
| ५५ | तपाईंको बच्चाहरु कति छन् ?                                                | हल सम्म बच्चा नपाएको/गर्भवति..... १<br>एउटा..... २<br>दुईवटा..... ३<br>तिनवटा..... ४                                                                                                                           |           |
| ५६ | तपाईं जम्मा कति पटक गर्भवती हुनुभयो ?                                     | जम्मा गर्भवती संख्या <input type="text"/>                                                                                                                                                                      |           |
| ५७ | तपाईं पहिलो पटक गर्भवती हुँदा कति वर्षको हुनुहुन्थ्यो ?                   | वर्षमा <input type="text"/> <input type="text"/>                                                                                                                                                               |           |

|    |                                                                                               |                                                                                                                                                                                                                                                                                                  |                      |
|----|-----------------------------------------------------------------------------------------------|--------------------------------------------------------------------------------------------------------------------------------------------------------------------------------------------------------------------------------------------------------------------------------------------------|----------------------|
| ५८ | तपाईं जम्मा कति पटक गर्भवती हुनु भयो ?                                                        | १<br>२<br>३                                                                                                                                                                                                                                                                                      |                      |
| ५९ | यो तपाईंको कुन पटकको गर्भ हो ?                                                                | १<br>२<br>३                                                                                                                                                                                                                                                                                      |                      |
| ६० | यो तपाईंको योजना अनुसार वा इच्छाईएको गर्भ हो ?                                                | योजना/चाहना अनुरूप रहेको गर्भ.....१<br>चाहना विपरित रहेको गर्भ.....२                                                                                                                                                                                                                             |                      |
| ६१ | तपाईंको विचारमा युवतीहरु किन चाडै गर्भवती हुन्छन् ?<br><br>(बहुउत्तर)                         | गल्तीले .....१<br>होशियार नभएकोले .....२<br>केटा वा केटी साथी बनाउने ईच्छाले .....३<br>फाइदा हुने भएकोले .....४<br>आमा बन्ने ईच्छाले .....५<br>अन्य (खुलाउनुहोस).....९६                                                                                                                          |                      |
| ६२ | तपाईं गर्भवती हुन कसरी प्रभावित हुनु भयो ?<br><br>(बहुउत्तर)                                  | साथीहरुको दवाफबाट.....१<br>श्रीमान बाट.....२<br>परिवारबाट.....३<br>दुबैको सल्लाह अनुसार.....४<br>सांस्कृतिक रितीरीवाज को कारणले.....५<br>सामाजिक संजाल तथा सुचना.....६<br>अन्य (खुलाउनुहोस).....९६                                                                                               |                      |
| ६३ | तपाईं गर्भवती हुँदा वा बच्चा जन्माउँदा कुनै किसिमको स्वास्थ्य समस्या वा कठिनाइहरु भएको थियो ? | थियो.....१<br>थिएन.....२ →                                                                                                                                                                                                                                                                       | प्रश्न ६५<br>मा जाने |
| ६४ | यदि थियो भने ती कठिनाइहरु के के थियो ?                                                        | गर्भपतन.....१<br>र्महना पुगनु भन्दा अगाडि बच्चा जन्मेको .....२<br>कम तौल भएको बच्चा जन्मेको .....३<br>सुत्केरीकोबेला समस्या भएको .....४<br>पाठेघर खस्ने.....५<br>यौन अंगको घाउ चोट पटक .....६<br>अपाङ्गता भएको बच्चा जन्मेको .....७<br>आमालाई अपाङ्गता बनाएको .....८<br>अन्य (खुलाउनुहोस).....९६ |                      |

|    |                                                                                                                       |                                                                                                                                                                                         |                      |
|----|-----------------------------------------------------------------------------------------------------------------------|-----------------------------------------------------------------------------------------------------------------------------------------------------------------------------------------|----------------------|
| ६५ | गर्भवती हुँदा र बच्चा जम्माए पछि तपाईंलाई बेखुशी वा नरमाइलो महसुस भएको थियो ?                                         | थियो.....१<br>थिएन.....२ →                                                                                                                                                              | प्रश्न ६७<br>मा जाने |
| ६६ | यदि थियो भने ति के के थिए भन्न सक्नुहुन्छ ?<br>(२, ३ बुँदामा लेख्नुहोस)                                               | .....                                                                                                                                                                                   |                      |
| ६७ | चाहै गर्भवती भएको कारणले तपाईंले विद्यालय, परिवार, छिमेक र समाजमा कुनै समस्या वा कठिनाइहरूको सामना गर्नु परेको थियो ? | थियो.....१<br>थिएन.....२ →                                                                                                                                                              | प्रश्न ६९<br>मा जाने |
| ६८ | यदि थियो भने ति समस्या वा कठिनाइहरू के के थिए ?                                                                       | विद्यालयको पढाइ छोडनु परेको.....१<br>बाआमा र परिवारमा अरुले अश्विकार गरेको.....२<br>लाजको महसुस गरेको .....३<br>एकलै भएको .....४<br>आर्थिक अभाव भएको .....५<br>अन्य (खुलाउनुहोस).....९६ |                      |

### च. यौन तथा HIV/AIDS रोगको ज्ञान सम्बन्धि प्रश्नहरू

|    |                                                        |                                                                                                                                                                                                                                                                                                                                                                                                       |                      |
|----|--------------------------------------------------------|-------------------------------------------------------------------------------------------------------------------------------------------------------------------------------------------------------------------------------------------------------------------------------------------------------------------------------------------------------------------------------------------------------|----------------------|
| ६९ | तपाईंलाई यौन रोग तथा HIV/AIDS को बारेमा थाहा छ ?       | छ.....१<br>छैन.....२ →                                                                                                                                                                                                                                                                                                                                                                                | प्रश्न ७२<br>मा जाने |
| ७० | एउटा व्यक्तिलाई कसरी यौन तथा HIV/AIDS रोग लाग्न सक्छ ? | यौन सम्पर्कबाट.....१<br>HIV/AIDS लागेको व्यक्तिलाई छोएर.....२<br>HIV/AIDS लागेको व्यक्तिले प्रयोग गरेको रुमाल तथा अन्य सामानहरू प्रयोग गरेर .....३<br>एउटै सुई तथा अन्य सामानहरूको पुन प्रयोग गरेर..४<br>बिरामीलाई रगत दिँदा.....५<br>गर्भधारणको बेला .....६<br>बच्चा जन्मदा आमाबाट बच्चामा सर्ने.....७<br>लामखुट्टे वा अन्य किराहरूको टोकाईबाट.....८<br>आमाको दुधबाट.....९<br>अन्य (खुलाउने) .....९६ |                      |

|                                                              |                                                                                                    |                                                                                                                                                                                                                                                                                                                                                                                                                                                                |                   |
|--------------------------------------------------------------|----------------------------------------------------------------------------------------------------|----------------------------------------------------------------------------------------------------------------------------------------------------------------------------------------------------------------------------------------------------------------------------------------------------------------------------------------------------------------------------------------------------------------------------------------------------------------|-------------------|
| ७१                                                           | एउटा ब्यक्तिले यौन रोग तथा HIV/AIDS बाट सुरक्षित रहन के गर्न सक्छ ?                                | विवाह भन्दा पहिले यौन सम्पर्क नराख्ने ..... १<br>धेरै जनासंग यौन सम्पर्क नराख्ने..... २<br>असुरक्षित यौन सम्पर्क नराख्ने..... ३<br>यौन सम्पर्क राख्ने काम पुर्णरूपमा बन्द गर्ने..... ४<br>श्रीमानप्रति यौन सम्बन्धमा इमानदार रहने..... ५<br>श्रीमानलाई पनि इमानदार रहन प्रोत्सहान गर्ने..... ६<br>दुषित रगतको प्रयोग नगर्ने..... ७<br>प्रत्येक पटकको यौन सम्पर्कमा कन्डमको प्रयोग गर्ने..... ८<br>एउटै सुई फेरि प्रयोग नगर्ने..... ९<br>अन्य (खुलाउने)..... ९६ |                   |
| <b>छ. यौन, परिवार नियोजन तथा गर्भापतन सम्बन्धि प्रश्नहरू</b> |                                                                                                    |                                                                                                                                                                                                                                                                                                                                                                                                                                                                |                   |
| ७२                                                           | पहिलो पटक शारिरीक सम्पर्क हुँदा तपाईंको उमेर कति थियो ?                                            | पुरा गरेको बर्ष <input type="text"/>                                                                                                                                                                                                                                                                                                                                                                                                                           |                   |
| ७३                                                           | तपाईंलाई परिवार नियोजनको साधनहरूको बारेमा थाहा छ ?                                                 | छ..... १<br>छैन..... २ →                                                                                                                                                                                                                                                                                                                                                                                                                                       | प्रश्न ७८ मा जाने |
| ७४                                                           | तपाईंले पहिलो तथा त्यस पछिको शारिरीक सम्पर्कको बेला परिवार नियोजनको कुनै साधनको प्रयोग गर्नु भयो ? | पहिलो शारिरीक सम्पर्कको बेला प्रयोग नगरेको ..... १<br>पहिलो शारिरीक सम्पर्कको बेला मात्र गरे..... २<br>पहिलो र त्यस पछिको शारिरीक सम्पर्कको बेला..... ३<br>चाहेको गर्भ भन्दा अगाडि सधै प्रयोग गरेको.. ..... ४<br>कहिले प्रयोग नगरेको ..... ५<br>अन्य (खुलाउने) ..... ९६                                                                                                                                                                                        |                   |
| ७५                                                           | यदि गरेको छैन वा गर्नु हुन्न भने किन ?                                                             | मलाइ/मेरो श्रीमानलाई यसको प्रयोग मन पर्दैन... १<br>उपलब्ध नभएर ..... २<br>यसले बाभोपना गर्छ ..... ३<br>स्वास्थ्य तथा महिनावरी चक्रमा असर... ..... ४<br>शरिरमा नकारात्मक असर ..... ५<br>किन्दा महँगो हुने भएकोले ..... ६<br>किन्ने पैसा नभएर..... ७<br>अर्को बच्चा बनाउने हाम्रो योजनाले गर्दा ..... ८<br>अन्य (खुलाउने) ..... ९६                                                                                                                               |                   |

|                                              |                                                                                                                       |                                                                                                                                                                                                                     |                   |
|----------------------------------------------|-----------------------------------------------------------------------------------------------------------------------|---------------------------------------------------------------------------------------------------------------------------------------------------------------------------------------------------------------------|-------------------|
| ७६                                           | नियमित शारिरीक सम्पर्क वा असुरक्षित यौन सम्पर्क पछि तपाईंले आकस्मिक परिवार नियोजनको कुनै साधन प्रयोग गर्नु भएको थियो? | गरेको थिए..... १<br>गरेको थिएन ..... २                                                                                                                                                                              |                   |
| ७७                                           | कहिले प्रयोग गर्नु भएको थियो?                                                                                         | ६ महिना अगाडि ..... १<br>७ देखि १२ महिना अगाडि ..... २<br>१३ महिना अगाडि ..... ३                                                                                                                                    |                   |
| ७८                                           | तपाईंले कहिले गर्भपतन गर्नु भएको छ ?                                                                                  | गरेको छु..... १<br>गरेको छैन..... २                                                                                                                                                                                 | प्रश्न ८१ मा जाने |
| ७९                                           | किन गर्भपतन गर्नु भएको ?                                                                                              | आफै गएको..... १<br>अवैधानिक गर्भ भएकोले..... २<br>चाढै गर्भ बसेको/मन नपरेकोले ..... ३<br>श्रीमानको दवावले गर्दा..... ४<br>परिवारको दवावले गर्दा..... ५<br>स्वास्थ्यको कारणले गर्दा..... ४<br>अन्य (खुलाउने)..... ९६ |                   |
| ८०                                           | यदि गरेको हो भने कहाँ गर्नु भएको थियो ?                                                                               | हस्पिटल/स्वास्थ्य संस्थामा..... १<br>प्राइभेट क्लिनिक/फार्मेसीमा..... २<br>परम्परागत उपाचर गर्ने व्यक्तिहरु..... ३<br>अन्य (खुलाउने)..... ९६                                                                        |                   |
| ८१                                           | गर्भपतनको असरको बारेमा थाहा छ?                                                                                        | छ..... १<br>छैन..... २                                                                                                                                                                                              |                   |
| ८२                                           | तपाईंलाई उपयुक्त समय र हप्ता थाहा छ जुन अवधिभित्र सुरक्षित गर्भपतन गर्न सक्नु हुन्छ ?                                 | १२ हप्ता अगाडि ( मेडिकल गर्भपतन) ..... १<br>१८ हप्ता अगाडि (बलत्कार)..... २<br>जुनसुकैबेला (स्वास्थ्यमा खतरा भएमा)..... ३<br>थाहा छैन..... ४<br>अन्य (खुलाउने)..... ९६                                              |                   |
| <b>ज. महिला सशक्तिकरण सम्बन्धि प्रश्नहरु</b> |                                                                                                                       |                                                                                                                                                                                                                     |                   |
| ८३                                           | तपाईं स्वास्थ्य चौकी, अस्पताल बजार र अन्य ठाउँहरुमा एकलै जानु हुन्छ ? यसरी जाँदा कुनै रोकावाट हुन्छ ?                 | जान्छु..... १<br>जान्न..... २                                                                                                                                                                                       |                   |
| ८४                                           | बिरामी परेको बेला वा गर्भ जाँचको लागि स्वास्थ्य संस्थामा जान तपाईं आफैले निर्णय गर्नसक्नु हुन्छ ?                     | सक्छु ..... १<br>सकदैन ..... २                                                                                                                                                                                      | प्रश्न ८६ मा जाने |

|                                                         |                                                                                                              |                                                                                                                                                                                         |                      |
|---------------------------------------------------------|--------------------------------------------------------------------------------------------------------------|-----------------------------------------------------------------------------------------------------------------------------------------------------------------------------------------|----------------------|
| ८५                                                      | यदि सब्दैन भने कसले निर्णय गर्छ ?                                                                            | श्रीमान ..... १<br>सासु ..... २<br>ससुरा..... ३<br>अन्य (खुलाउने)..... ५                                                                                                                |                      |
| ८६                                                      | श्रीमान वा सासु ससुराको स्वीकृतीबिना दैनिक आवश्यक पर्ने सामानहरुको खरिदको लागि पैसा खर्च गर्नु सक्नु हुन्छ ? | सक्छु ..... १<br>सब्दैन ..... २                                                                                                                                                         |                      |
| <b>भ. हिंसा तथा शारिरिक/यौन शोषण सम्बन्धि प्रश्नहरु</b> |                                                                                                              |                                                                                                                                                                                         |                      |
| ८७                                                      | तपाईं आफ्नो परिवारसंग हुँदा सुरक्षित महसुस गर्नुहुन्छ ?                                                      | गर्छु ..... १ →<br>गर्दिन ..... २                                                                                                                                                       | प्रश्न ८९<br>मा जाने |
| ८८                                                      | यदि सुरक्षित महसुस गर्नुहुन्छ भने किन ?                                                                      | शारिरिक शोषण को डर..... १<br>मानसिक शोषण/यातना..... २<br>यौन दुव्यवहार..... ३                                                                                                           |                      |
| ८९                                                      | तपाईं कहिलै यौन शोषणको शिकार हुनुभएको छ ?                                                                    | छ..... १<br>छैन..... २ →                                                                                                                                                                | प्रश्न ९४<br>मा जाने |
| ९०                                                      | तपाईं कति पटक यौन शोषणमा पर्नु भएको छ ?                                                                      | नियमित ..... १<br>प्राय जसो ..... २<br>कहिले काँही ..... ३<br>एकदम कममात्रमा ..... ४                                                                                                    |                      |
| ९१                                                      | तपाईंलाई यौन शोषण गर्ने व्यक्ति को थिए/हुन?<br><br>(बहुत्तर)                                                 | काम वा जागिर दिने/लगाईदिने..... १<br>श्रीमान ..... २<br>परिवारको अन्य सदस्य ..... ३<br>सुरक्षाकर्मी ..... ४<br>साथी ..... ५<br>छिमेकी/समुदायको मान्छे ..... ६<br>अन्य (खुलाउने) ..... ७ |                      |
| ९२                                                      | पछिल्लो पटक तपाईं यौन शोषणमा परेको घटनाबारे जिम्मेवार अभिभावकलाई भन्नुभएको थियो ?                            | भने ..... १<br>भनिन ..... २                                                                                                                                                             |                      |

|                                       |                                        |                                                                                                                                                                               |                                 |
|---------------------------------------|----------------------------------------|-------------------------------------------------------------------------------------------------------------------------------------------------------------------------------|---------------------------------|
| ९३                                    | यदि भन्नु भएन भने किन नभन्नु भएको हो?  | भनेर केही पनि हुदैन ..... १<br>कसैले सुन्दैन ..... २<br>डरले गर्दा ..... ३<br>लाजले गर्दा ..... ४<br>भन्ने कोही नभएर ..... ५<br>अन्य (खुलाउने) ..... ९६<br>थाहा नभएर ..... ९९ |                                 |
| <b>ज. अपाङ्गता सम्बन्धि प्रश्नहरु</b> |                                        |                                                                                                                                                                               |                                 |
| ९४                                    | तपाईंमा कुनै किसिमको अपाङ्गता छ ?      | छ ..... १<br>छैन ..... २                                                                                                                                                      | <input type="checkbox"/> रोक्ने |
| ९५                                    | यदि छ भने कस्तो किसिमको अपाङ्गता छ ?   | दृष्टी सम्बन्धी ..... १<br>श्रवण सम्बन्धी ..... २<br>मानसिक ..... ३<br>शारिरीक ..... ४<br>वहू अपाङ्गता ..... ५                                                                |                                 |
| ९६                                    | तपाईंमा अपाङ्गता कहिलेदेखि भएको थियो ? | जन्मैदेखि ..... ८८८<br>जन्मेपछि (उमेर वर्षमा) ..... <input type="text"/>                                                                                                      |                                 |

धन्यवाद
